# Supplementary material for: OIRF-LEnKF v1.0: A Self-evolving Data Assimilation System by Integrating Incremental Machine Learning with a Localized EnKF for Enhanced PM 2.5 Chemical Component Forecasting and Analysis
Source: Copernicus journal article supplement (doi:10.5194/egusphere-2025-3960), 2025-09-11
Supplement: Supplementary file [file egusphere-2025-3960-AC3-supplement.pdf]

## Authors' responses to Referees' comments

**Journal:** Geoscientific Model Development

**Manuscript Number:** egusphere-2025-3960

**Title:** OIRF-LEnKF v1.0: A Self-evolving Data Assimilation System by Integrating Incremental Machine Learning with a Localized EnKF for Enhanced PM<sub>2.5</sub> Chemical Component Forecasting and Analysis

**Authors:** Hongyi Li, Ting Yang, et al.

Note:

Comment (12-point black italicized font).

Reply (indented, 12-point blue normal font).

“Revised text as it appears in the text (in quotes, 12-point blue italicized font)”.

---

### Anonymous Referee #1

#### *1 General Comments:*

*This paper presents a method called the optimized incremental random forest ensemble forecasting model with the localized ensemble Kalman filter (OIRF-LEnKF), which combines an computationally lightweight emulator of PM<sub>2.5</sub> chemical components with the efficient and accurate data assimilation method LEnKF. This paper also presents a mechanism for online learning to update the OIRF model as new data arrives. The results on a real-world assimilation task of PM<sub>2.5</sub> concentrations in a region in China show that the proposed algorithm is effective in remaining stable across a long assimilation horizon while effectively assimilating observations that lead the analyses to remain close to a notion of ground truth (based on reanalysis). **The use of machine learning in various data assimilation applications is an important investigation,** however, the authors could provide more motivation for particular choices made while creating the OIRF-LEnKF algorithm and perhaps further contextualize this work in relation to related work.*

#### Authors' response:

We sincerely thank the reviewer for the thoughtful review of our manuscript. We fully agree that a more robust justification for our specific methodological choices, as well as further contextualization of our work within the existing work, would enhance

the quality of our research.

In our detailed point-by-point responses below, we have addressed all scientific comments. Accordingly, in the revised manuscript, we have enhanced methodological motivation and contextualized this work in relation to related work.

## **2 Scientific Comments:**

*1) The authors propose a random forest model that is incrementally optimized as new information about the system is obtained, but provides minimal motivation for the choice of random forest over other approaches. This application area involves spatial datasets, which make a neural network architecture like a CNN a good fit, especially given that many state-of-the-art emulators of spatial systems rely in part on CNNs. The motivation for the choice of RF should be made more clear in the paper; and perhaps an ablation against a CNN-type architecture should be provided. To create an ensemble like a random forest, the CNN training could be bagged.*

### **Authors' response:**

We thank the reviewer for this insightful and constructive comment. We agree that providing stronger motivation for our choice of the Random Forest (RF) model is crucial, and we appreciate the suggestion to consider deep neural networks (such as CNNs). In the revised manuscript, we have expanded our justification for selecting RF as the surrogate model for atmospheric chemistry transport modeling, based on the following key considerations.

**a. Computational Feasibility for Incremental Learning.** Our proposed machine learning (ML) -based data assimilation (DA) framework requires the frequent retraining and updating of ML model members using newly assimilated analysis fields. However, an ensemble CNN approach is less optimal for this incremental learning mechanism. As presented in **Table R1**, under comparable hardware conditions, the training cost for a single CNN model is approximately an order of magnitude higher than that for an RF model (Xi, 2022; Debjyoti and Utpal, 2025). Consequently, serially constructing a 50-member ensemble CNN would incur a training time cost roughly 500 times greater than

that of an RF model. While CNN can indeed be bagged to create an ensemble, this approach is computationally prohibitive for the frequent ML model updates required by ML-DA framework.

**b. Balanced Performance and Inference Speed for Prediction of PM<sub>2.5</sub> and its chemical components.** Recent studies indicate that the predictive accuracy of RF for PM<sub>2.5</sub> and its chemical components is comparable to that of advanced deep learning models (Abuouelezz et al., 2025; Chen et al., 2023; Li et al., 2025). Notably, under the same hardware constraints, the inference speed of an RF model can be approximately 10 times faster than that of comparable CNN or Transformer models (Jalali et al., 2025). Consequently, RF models can achieve forecasting accuracy comparable to CNN models at a fraction of the computational cost, which is essential for maintaining the timeliness of the iterative forecast-assimilation cycle in our proposed system.

**Introduction, Line 90-97:** “*The Random Forest (RF) model (Gohari et al., 2025; Lin et al., 2022; Lv et al., 2021; Meng et al., 2018) and Deep Neural Networks (DNNs) (Li et al., 2025; Liu et al., 2023) have been widely used for simulating and predicting PM<sub>2.5</sub> chemical component concentrations, with DNNs achieving a marginally superior predictive accuracy. However, a single DNN is outperformed by a RF model in terms of the computational efficiency during both training and inference (Debhyoti and Utpal, 2025; Jalali et al., 2025; Xi, 2022). Within an ensemble DA framework, periodically creating and running an ensemble of DNNs imposes a significant computational burden in contrast to the RF model, which inherently provides an ensemble. Consequently, the RF model offers an optimal trade-off between predictive performance and computational demand, making it a practical and efficient choice for coupling with ensemble DA.*”

**Table R1. Literature review of performance comparison between RF and CNN**

| Task type      | Training cost  |                 | Inference speed   |                   | Error rate                               |                                          | Citation                 |
|----------------|----------------|-----------------|-------------------|-------------------|------------------------------------------|------------------------------------------|--------------------------|
|                | RF             | CNNs            | RF                | CNNs              | RF                                       | CNNs                                     |                          |
| Classification | 20 minutes     | 3 hours         | \                 | \                 | 10.02%                                   | 9.67%                                    | Xi, 2022                 |
| Recognition    | 12.7s per fold | 186.4s per fold | 0.8s per fold     | 0.2s per fold     | 2.90%                                    | 2.09%                                    | Debjyoti and Utpal, 2025 |
| Classification | \              | \               | 0.028s per sample | 0.218s per sample | \                                        | \                                        | Jalali et al., 2025      |
| Regression     | \              | \               | \                 | \                 | 0.73-2.43% for training set              | 7.85-20.05% for training set             | Li et al., 2025          |
| Regression     | \              | \               | \                 | \                 | 17.74%                                   | 18.06%                                   | Chen et al., 2023        |
| Regression     | \              | \               | \                 | \                 | 0.216 for 1-h PM <sub>2.5</sub> forecast | 0.213 for 1-h PM <sub>2.5</sub> forecast | Abuouelezz et al., 2025  |

## Reference

Abuouelezz, W., et al.: Exploring PM<sub>2.5</sub> and PM<sub>10</sub> ML forecasting models: a comparative study in the UAE. Sci Rep, 15, 9797, <https://doi.org/10.1038/s41598-025-94013-1>, 2025.

Chen, M.-H., et al.: PM<sub>2.5</sub> Concentration Prediction Model: A CNN-RF Ensemble Framework, Int. J. Environ. Res. Public Health, 20, 4077. <https://doi.org/10.3390/ijerph20054077>, 2023.

Debjyoti, G. and Utpal, R.: Comprehensive Benchmark Study of Machine Learning and Deep Learning Approaches for Human Activity Recognition using the UCI HAR Dataset, Int. J. Comput. Appl., 187, 66-69. <https://doi.org/10.5120/ijca2025925797>, 2025

Jalali, M.W., et al.: Scalable AI-driven air quality forecasting and classification for public health applications, Discov. Atmos., 3, 25, <https://doi.org/10.1007/s44292-025-00052-8>, 2025.

Li, H., et al.: Interpreting hourly mass concentrations of PM<sub>2.5</sub> chemical components with an optimal deep-learning model. J. Environ. Sci., 151, 125-139, <https://doi.org/10.1016/j.jes.2024.03.037>, 2025.

Xi, E.: Image Classification and Recognition Based on Deep Learning and Random Forest Algorithm, Wirel. Commun. Mob. Com., 2013181, <https://doi.org/10.1155/2022/2013181>, 2022.

2) Have there been other successful ML models of PM<sub>2.5</sub> chemical components? If so, they should be cited in the related work. If these emulators do exist, why were any of them not used instead of the authors' proposed random forest model?

**Authors' response:**

We thank the reviewer for raising this important point regarding related work and model selection.

**Q1:** Have there been other successful ML models of PM<sub>2.5</sub> chemical components?

**A1:** **Table R2** summarizes the successful ML models for the prediction of PM<sub>2.5</sub> chemical components. As replied to the Scientific Comment #1, the related work has been cited in the *Introduction* of the revised manuscript.

**Table R2. Literature review of ML models used for the prediction of PM<sub>2.5</sub> chemical components**

| ML models  | Target features                                                              | Performance on testing set         | Citation                |
|------------|------------------------------------------------------------------------------|------------------------------------|-------------------------|
| RF         | Sulfate, nitrate, organic carbon, elemental carbon                           | R <sup>2</sup> : 0.71-0.86         | Meng, et al., 2018      |
| RF         | Sulfate, nitrate, ammonium, organic carbon, elemental carbon                 | R: 0.71-0.81                       | Lv et al., 2021         |
| RF         | Nitrate                                                                      | R <sup>2</sup> : 0.58              | Lin et al., 2022        |
| CNN-LSTM   | Sulfate, nitrate, organic carbon, elemental carbon, crustal metals           | R <sup>2</sup> : 0.87-0.96         | Liu et al., 2023        |
| 4D-STDF    | Sulfate, nitrate, ammonium, chloride                                         | CV-R <sup>2</sup> : 0.66-0.75      | Wei et al., 2023        |
| CNN-BiLSTM | Sulfate, nitrate, ammonium, organic carbon, elemental carbon                 | R <sup>2</sup> : 0.81-0.97         | Li et al., 2025         |
| PLS-SVM    | Sulfate, nitrate, ammonium, organic carbon, elemental carbon, crustal metals | R <sup>2</sup> : 0.82-0.98         | Khuzestani et al., 2025 |
| RF         | Calcium, elemental carbon, silicon, sulfate                                  | Spatial R <sup>2</sup> : 0.93-0.95 | Gohari et al., 2025     |

**Q2:** Why were any of them not used instead of the authors' proposed random forest model?

**A2:** As replied to the Scientific Comment #1, the RF model was selected as an optimal compromise between computational efficiency and predictive accuracy for the ensemble framework. Although **Table R2** indicates that RF's extrapolation capability

may limit its performance on testing set compared to other deep neural networks, we have designed an incremental learning mechanism to allow the RF model to continually adapt to new data distributions. However, the incremental learning mechanism relies on the availability of analysis fields assimilated observations. During periods of missing observations, the RF model remains susceptible to its poor extrapolation capability. We fully agree that ensemble CNNs could be more effective than RF in capturing nonlinear relationships, particularly for spatially structured data. In response to the reviewer's concern, we have added a dedicated discussion on the limitations of RF (now *Section 3.4*) and have renumbered the original *Section 3.4* as *Section 3.3.3*.

**Section 3.4, Line 621-637: “3.4 Limitations**

*Although the OIRF model serves as an efficient surrogate for the CTM in generating simulation or forecast ensembles for data assimilation, it inherits a constrained extrapolation capability of tree-based models. Specifically, the OIRF model may exhibit a tendency to saturate at learned extremes when extrapolating beyond its training data distribution, which directly limits its generalizability in diverse and complex atmospheric scenarios, such as the pollution extremes in seasons outside the training period. The poor performance of tree-based models on testing sets has been reported in our previous study (Li et al., 2025). Our incremental learning mechanism is designed to mitigate the extrapolation limitation by dynamically updating the RF model with new knowledge. However, the effectiveness of incremental learning is contingent upon the availability of high-quality analysis fields. A lack of observations, which prevents the generation of analysis fields, exposes the OIRF model to its inherent extrapolation limitations, leading to compromised simulation accuracy.*

*Replacing the RF model with an ensemble of deep neural networks (DNNs) holds promise for superior nonlinear mapping and extrapolation. However, the considerably higher computational cost required for both training and inference of DNNs (Debjyoti and Utpal, 2025; Xi, 2022) results in an operational bottleneck that the process of updating and running an ensemble of DNNs can be slower than traditional CTM-based ensemble simulations, which could offset its accuracy advantages. Therefore, balancing the inherent predictive performance of a machine learning model against its*

*computational cost remains a central challenge for the practical online coupling of machine learning with data assimilation.”*

## Reference

Gohari, K., et al.: Exploring multivariate machine learning frameworks to parallelize PM<sub>2.5</sub> simultaneous estimations across the continental United States. Environ. Pollut., 374, 126161, <https://doi.org/10.1016/j.envpol.2025.126161>, 2025.

Khuzestani, R.B., et al.: Advancing Particulate Matter Chemical Composition Analysis: A Hybrid Machine-Learning Approach with UV-Vis Spectroscopy. Aerosol Sci. Eng., <https://doi.org/10.1007/s41810-025-00282-8>, 2025.

Li, H., et al.: Interpreting hourly mass concentrations of PM<sub>2.5</sub> chemical components with an optimal deep-learning model. J. Environ. Sci., 151, 125-139, <https://doi.org/10.1016/j.jes.2024.03.037>, 2025.

Lin, G. Y., et al.: A machine learning model for predicting PM<sub>2.5</sub> and nitrate concentrations based on long-term water-soluble inorganic salts datasets at a road site station, Chemosphere, 289, <https://doi.org/10.1016/j.chemosphere.2021.133123>, 2022.

Liu, K., et al.: Time series prediction of the chemical components of PM<sub>2.5</sub> based on a deep learning model, Chemosphere, 342, 140153, <https://doi.org/10.1016/j.chemosphere.2023.140153>, 2023

Lv, L., et al.: Application of machine learning algorithms to improve numerical simulation prediction of PM<sub>2.5</sub> and chemical components, Atmos. Pollut. Res., 12, 101211, <https://doi.org/10.1016/j.apr.2021.101211>, 2021.

Meng, X., et al.: Space-time trends of PM<sub>2.5</sub> constituents in the conterminous United States estimated by a machine learning approach, 2005-2015, Environ. Int., 121, 1137-1147, <https://doi.org/10.1016/j.envint.2018.10.029>, 2018.

Wei, J., et al.: Separating Daily 1 km PM<sub>2.5</sub> Inorganic Chemical Composition in China since 2000 via Deep Learning Integrating Ground, Satellite, and Model Data, Environ. Sci. Technol., 57, 46, 18282-18295, <https://doi.org/10.1021/acs.est.3c00272>, 2023.

3) In line 90, a claim is made that increasing the number of ensemble members in the forecast “mitigates the underestimation of forecast error covariance”. It certainly helps mitigate, but it is not an assured cure. The authors should modify the language to something like “helps mitigate” to make the statement more accurate.

**Authors’ response:**

We thank the reviewer for this precise comment. We agree that the original wording was too absolute. We have modified the text as suggested.

**Introduction, Line 101-102:** “...The OIRF model is capable of providing a large number of background ensemble members at a reduced computational cost, which helps mitigate the underestimation of background error covariance...”

4) Is the idea of throwing away decision trees that do not perform as well as a predefined threshold on the updated dataset a novel contribution of this paper, or has this approach been used elsewhere? If it has been used elsewhere, the previous works should be cited.

**Authors’ response:**

We thank the reviewer for this insightful question regarding the novelty of our proposed Optimized Incremental Random Forest (OIRF). We are aware of related work on incremental RF, such as hi-RF (Xie et al., 2016). The hi-RF model discards decision trees (DTs) with high errors based on an out-of-bag (OOB) error threshold and retrains new DTs using a combined dataset of old and new data, which shares a conceptual similarity with our OIRF model. However, key methodological distinctions exist.

a. The hi-RF model constructs new DTs from a merged bootstrap sample of old and new data without hyperparameter tuning, which may result in the performance of the new DTs being inferior to that of the discarded DTs, introducing uncertainties into the incremental learning. In contrast, the OIRF model updates DT members within a parallel Bayesian optimization framework to optimize the new RF structure, mitigating the uncertainties in incremental learning.

b. The number of high-error DTs replaced in hi-RF is variable over time, since it



depends on a dynamic OOB error threshold. Large and variable replacements of DTs could introduce instability or drift into the estimation of background error covariance within the data assimilation cycle. Our OIRF method employs a threshold depending on a percentile of statistical errors, which allows for controlled and stable replacement of DT members. This design makes OIRF more suitable for stable and long-term online coupling with a data assimilation framework.

Following the reviewer's suggestion, we have cited the relevant work in the revised manuscript and have clarified the specific advancements of our proposed method.

**Section 2.1.2, Line 162-168:** *“Inspired by the idea of dynamically updating DTs with weak performance (Xie et al., 2016), the OIRF model incorporates a novel incremental learning mechanism into the RF model, enabling it to conduct effective updating from newly available training data within a simulation-assimilation cycle. In the incremental learning mechanism, the OIRF model scores the simulation performance of each DT based on the mean absolute error (MAE), as shown in Eq. (2). The MAE is quantified by the DT outputs and high-accuracy analysis fields at the same time step. A leakage-aware evaluation indicates that using the analysis field as scoring target did not cause substantial information leakage, while employing the independent high-quality observation as scoring target is also recommended (Sect. S1 in the Supplement).”*

**Section 2.1.2, Line 175-180:** *“The incremental learning mechanism introduces a threshold ( $\tau_p$ ) to screen out the DTs with poor simulation performance. The threshold is defined as the  $p^{\text{th}}$  percentile value of  $f_n^{\text{score}}$ . The percentile-based threshold ensures a stable and controllable number of DTs are updated, a critical feature for maintaining the smoothness and stability of the estimation of background error covariance within the ensemble data assimilation framework and preventing model overfitting to the new information. As shown in Eq. (3), the old DTs with scores not higher than  $\tau_p$  are retained, while the old DTs with scores higher than  $\tau_p$  will be replaced by new DTs obtained from the incremental learning process.”*

**Section 2.1.2, Line 192-196:** *“Notably, the incremental learning mechanism generates new DTs within a Bayesian optimization framework, which ensures that the updated RF model simultaneously acquires new knowledge and preserves optimal hyperparameters*

*over time. Consequently, the incremental learning mechanism enhances the capacity of the OIRF model to incorporate newly available training data and replace the underperforming DTs with deterministically superior ones, thereby dynamically improving its generalization ability in simulating PM<sub>2.5</sub> chemical component concentrations.”*

## Reference

Xie, T., et al.: hi-RF: Incremental Learning Random Forest for Large-Scale Multi-class Data Classification, Proceedings of the 2016 2nd International Conference on Artificial Intelligence and Industrial Engineering (AIIE 2016), <https://doi.org/10.2991/aiie-16.2016.72>, 2016.

## 3 Technical Corrections:

1) *It would be helpful to spell out the name of the OIRF-LEnKF in the abstract (line 15).*

### Authors' response:

We thank the reviewer for this helpful suggestion. In the revised manuscript, we have replaced “OIRF-LEnKF” with its full name.

**Abstract, Line 15-18:** *“...This paper introduces an incrementally updatable machine learning-based data assimilation system (Optimized Incremental Random Forest coupled with Localized Ensemble Kalman Filter, OIRF-LEnKF v1.0) that achieves high efficiency and high quality in generating background and analysis fields for chemical components...”*

2) *In line 55, “DA technique has been widely used [...]” should be corrected to either “DA has been widely used [...]” or “DA techniques have been widely used [...].”*

### Authors' response:

We thank the reviewer for catching this expression inaccuracy. We have removed the work “technique” in the revised manuscript.

**Introduction, Line 57-58:** “...DA has been widely used to generate reanalysis datasets of PM<sub>2.5</sub> chemical components at global and national scales...”

3) “Where ” immediately after equation (1) should be lowercase.

**Authors’ response:**

We thank the reviewer for pointing out this oversight. We agree and have corrected the capitalization accordingly in the revised manuscript.

**Section 2.1.2, Line 156:** “where  $x$  represents the input features...”

4) What criteria is used to determine a split for each decision tree? Is it based on MAE? This should be made more clear in the text (roughly around line 145).

**Authors’ response:**

We thank the reviewer for this insightful question, which allows us to clarify an important methodological detail. The criterion for selecting the optimal split at each node during the training of an individual decision tree (DT) is the maximization of the reduction in Mean Squared Error (MSE). We have revised the manuscript to explicitly state that the splitting criterion for each DT.

**Section 2.1.2, Line 159-160:** “The criterion for selecting the optimal split at each node during the training of an individual DT involves maximizing the reduction in mean squared error (MSE) over all splitting candidates.”

5)  $y$  is used to describe an analysis in line 154 but is then used to describe observations in line 215. The authors should stay consistent in the text that  $y$  refers to observations.

**Authors’ response:**

We sincerely thank the reviewer for catching this inconsistency in our notation. In response to the Reviewer’s suggestions, we revised the manuscript to stay consistent in the text that “ $y$ ” refers to observations.

**Section 2.1.2, Line 169-190:** “

$$f_n^{score} = \frac{1}{K} \sum_{i=1}^K |x_i^{ana} - f^{DT}(x_i, \theta_n)|, n = 1, 2, \dots, N, \quad (2)$$

Here,  $f_n^{score}$  is the MAE value of the  $n^{th}$  DT.  $K$  is the total number of grids of  $PM_{2.5}$  chemical component concentrations.  $x_i^{ana}$  is the analysis value of concentrations at the  $i^{th}$  grid point after DA.  $f^{DT}(x_i, \theta_n)$  denotes the simulation value of the  $n^{th}$  DT at the  $i^{th}$  grid point. Notably,  $x_i$  used in machine learning denotes the input features, while  $x_i^{ana}$  used in data assimilation denotes the analysis states.

$$f_t^{DT} = \begin{cases} f^{DT}(x, \theta_n | x_{t-\Delta t}^{ana}), f_n^{score} \leq \tau_p, n = 1, 2, \dots, N_p \\ f^{DT}(x, \theta_n | x_t^{ana}), f_n^{score} > \tau_p, n = N_p + 1, N_p + 2, \dots, N \end{cases}, \quad (3)$$

Here,  $f_t^{DT}$  represents the final output of the updated DTs following incremental learning at time  $t$ .  $f^{DT}(x, \theta_n | x_{t-\Delta t}^{ana})$  denotes the output of the retained old DTs while  $f^{DT}(x, \theta_n | x_t^{ana})$  refers to the output of the new DTs.  $\Delta t$  represents the time interval of incremental learning.  $\tau_p$  indicates the  $p^{th}$  percentile value of  $f_n^{score}$  ( $n = 1, 2, \dots, N$ ), and  $N_p$  signifies the number of retained old DTs that achieve a score not exceeding  $\tau_p$ . The  $p$  is set at 80 to prevent excessive updating of DTs, which may introduce instability and artificially optimistic performance into ensemble simulation of the OIRF model.

The final simulation ( $f^{OIRF}(x)$ ) of the OIRF model at time  $t$  is derived from Eq. (4) by averaging the outputs of the updated DTs.

$$f_t^{OIRF}(x) = \frac{1}{N} \sum_{n=1}^N f_t^{DT}(x, \theta_n), \quad (4)$$

6) In lines 154-155, should "nth grid point after DA" be changed to the "ith grid point"?

And similarly should "nth DT at the nth grid point" be changed to "nth DT at the ith grid point"?

#### Authors' response:

We thank the reviewer for this precise and correct observation. The revised version

can be found in the reply to **Technical Correction #5**.

7) Immediately after equation (5), it should be made clear that  $\overline{f_t^{DT}(x, \theta_n)}$  with a bar over the expression refers to the ensemble mean across decision trees in the random forest.

**Authors' response:**

We thank the reviewer for the suggestion. The revised version is as follows.

**Section 2.1.3, Line 228-229:** “Here,  $\mathbf{P}_t^f$  is the flow-dependent background error covariance matrix of  $PM_{2.5}$  chemical component concentrations at time  $t$ ,  $\overline{f_t^{DT}(x, \theta_n)}$  refers to the ensemble mean across decision trees in the random forest at time  $t$ .”

8) I think that the paper would benefit from a mathematical formulation of the difference between domain localization and observation localization (in the section in lines 219-243).

**Authors' response:**

We thank the reviewer for this insightful suggestion. The fundamental update form of the EnKF with domain localization is analogous to the global EnKF (as presented in original Eq. (9) of the original manuscript) but uses forecast fields and observations within a specific localization radius. In response to the Reviewer's suggestion, we have added the mathematical formulation of domain localization.

**Section 2.1.3, Line 253-262:** “To address this challenge, domain localization in our system conducts assimilation for each analysis grid point using only background fields and observations within a specific localization radius (Fig. 2), with the same update form as global EnKF (Eq. (10)). The fundamental update form is presented in Eq. (11).

$$x_{n,i}^{ana} = f_i^{DT}(x, \theta_n) + \mathbf{K}_\delta \left( y_\delta^o + y_{n,\delta}'^o - H_\delta \left( f_i^{DT}(x, \theta_n) \right) \right), n = 1, 2, \dots, N, \quad (11)$$

Here,  $x_{n,i}^{ana}$  is the analysis value at  $i^{th}$  grid point of the  $n^{th}$  ensemble member.  $f_i^{DT}(x, \theta_n)$  is the background value at  $i^{th}$  grid point of the  $n^{th}$  ensemble member.  $\mathbf{K}_\delta$

is the local Kalman gain matrix computed from the ensemble covariance within the localization domain  $\delta$ .  $y_{\delta}^o$  is the observation of PM<sub>2.5</sub> chemical components within the localization domain  $\delta$  and  $y'_{n,\delta}^o$  is the observation perturbation of the  $n^{th}$  ensemble member within the localization domain  $\delta$ .  $H_{\delta}$  is the linear observation operator within the localization domain  $\delta$ .”

9) The construction of  $W$  in equation (11) is not immediately clear. What values do  $i$  and  $j$  range from? Why is this matrix forced to be diagonal? What is the dimensionality of  $W$ ? The answers to these questions should be made more clear in the text.

**Authors’ response:**

a.  $i$  ranges from one to the total number of analysis grids within the whole domain,  $j$  ranges from one to the total number of observation sites within a localization domain.

b. The observation error covariance matrix  $\mathbf{R}$  is assumed to be diagonal in practice, implying that observation errors are spatially uncorrelated and the observations can be processed serially (Nerger, 2015; Valler et al., 2019). The distance-based weight matrix  $\mathbf{W}$  is consequently constructed as a diagonal matrix, applying a distance-dependent weighting directly to the diagonal elements of observation error covariance matrix  $\mathbf{R}$  to attenuate the influence of observations that are farther from the target analysis point.

c.  $\mathbf{W}$  is an  $n \times n$  matrix, where  $n$  denotes the number of effective observations within the localization domain.

In response to the Reviewer’s suggestion, we have revised the text.

**Section 2.1.3, Line 282-287:** “The distance-based weight matrix ( $\mathbf{W}_i$ ) for the  $i^{th}$  localization domain is obtained using a Gaussian function:

$$\mathbf{W}_i = \text{diag} \left( \exp \left( \frac{-d(i,j)^2}{2L^2} \right) \right), j = 1, 2, \dots, N_{obs} , \quad (13)$$

Here,  $d(i,j)$  is the Euclidean distance between center grid point of the  $i^{th}$  localization domain and observation point  $j$ .  $L$  is the decorrelation length.  $N_{obs}$  is the total number of effective observations within the  $i^{th}$  localization domain.  $\mathbf{W}$  is constructed as a diagonal matrix ( $N_{obs} \times N_{obs}$ ), applying a distance-dependent weighting directly

to the diagonal elements of observation error covariance matrix  $R_t$ .”

## Reference

Nerger, L.: On Serial Observation Processing in Localized Ensemble Kalman Filters. Mon. Wea. Rev., 143, 1554-1567, <https://doi.org/10.1175/MWR-D-14-00182.1>, 2015.

Valler, V., Franke, J., and Brönnimann, S.: Impact of different estimations of the background-error covariance matrix on climate reconstructions based on data assimilation, Clim. Past, 15, 1427-1441, <https://doi.org/10.5194/cp-15-1427-2019>, 2019.

10) In Table 1, could the authors please also list the dimensions of the analysis (# latitudes, # longitudes, # features)?

## Authors’ response:

We thank the reviewer for the suggestion. The revised Table 1 is as follows.

**Table 1. Fundamental configuration parameters in OIRF-LEnKF v1.0.**

| Category            | Parameter                    | Setting                                                                                                                                  |
|---------------------|------------------------------|------------------------------------------------------------------------------------------------------------------------------------------|
| Ensemble simulation | State variable               | $\text{SO}_4^{2-}$ , $\text{NO}_3^-$ , $\text{NH}_4^+$ , OC and BC                                                                       |
|                     | Model domain                 | North China<br>(32.38°N -44.90°N, 108.07°E-127.01°E)                                                                                     |
|                     | Spatial resolution           | 5 km×5 km                                                                                                                                |
|                     | Temporal resolution          | 1 h                                                                                                                                      |
|                     | Meteorological input feature | U-component wind, V-component wind, temperature, relative humidity and geopotential                                                      |
|                     | Anthropogenic input feature  | $\text{PM}_{2.5}$ , $\text{PM}_{10}$ , $\text{SO}_2$ , $\text{NO}_2$ , CO and $\text{O}_3$                                               |
|                     | Ensemble size                | 2, 5, 10, 15, 20, 30, 40, 50, 100, 200                                                                                                   |
|                     | Update frequency             | 0, 18-h interval, 12-h interval, 6-h interval, 1-h interval                                                                              |
|                     | Hyperparameter for tuning    | Minimum number of leaf node observations, maximal number of decision splits, and number of predictors to select at random for each split |
|                     | Optimization iteration       | 30                                                                                                                                       |
| Data assimilation   | Data partition               | Re-partition at every iteration                                                                                                          |
|                     | State dimension              | 5, including $\text{SO}_4^{2-}$ , $\text{NO}_3^-$ , $\text{NH}_4^+$ , OC and BC                                                          |
|                     | Latitudinal dimension        | 249 grids                                                                                                                                |
|                     | Longitudinal dimension       | 300 grids                                                                                                                                |
|                     | Algorithm                    | LEnKF                                                                                                                                    |
|                     | Localization radius          | 200 km                                                                                                                                   |
|                     | Decorrelation length         | 80 km                                                                                                                                    |

11) In Figure 3a, is the objective referenced from the Bayesian optimization? It may be more clear to reference an equation number in the caption. In Figure 3c, why is there a sudden decrease at an ensemble size of 30 in the OIRF-LEnKF/NP2 (%)?

**Authors' response:**

We thank the reviewer for the suggestion. The objective value in Fig. 3a is derived from the Bayesian optimization. We have supplemented the objective function in Bayesian optimization and referenced an equation number in the caption.

Section 2.1.2, Line 213-216:  $J(\theta) = \ln(1 + \frac{1}{N} \sum_{i=1}^N (y_i^{\text{pred}}(\theta) - y_i^o)^2)$ , (5)

Here,  $J(\theta)$  represents the objective value,  $\theta$  represents the set of hyperparameters under optimization,  $N$  is the total number of samples in the training dataset.  $y_i^{\text{pred}}(\theta)$  is the predicted value for the  $i^{\text{th}}$  sample,  $y_i^o$  is the observation value for the  $i^{\text{th}}$  sample.”

Figure 3a, Caption: “...(a) Variation in the minimum objective value throughout the Bayesian optimization process and time consumed by each iteration, determined by Eq. (5)...”

We attribute the sudden decrease in the OIRF-LEnKF/NP2 ratio at an ensemble size of 30 to a significant increase in the computational time required by the NP2 forecast. This fluctuation is likely related to inherent uncertainties in the two-level parallel structure of NP2. In NP2, ensemble members are distributed across multiple computing nodes in a cluster, while the grid points for a single member are further parallelized across multiple CPUs within a node (Li et al., 2024). This structure can occasionally lead to communication congestion or latency between different MPI communicators (the communicators used in NP2 are presented in Fig. R1 in Wang et al. (2022)’s study), resulting in an augmentation of additional computational cost. In contrast, the OIRF-LEnKF is designed to avoid such uncertainties. The state variables, namely five PM<sub>2.5</sub> chemical components, are processed independently on five separate computational nodes (Fig. 2 in our manuscript), eliminating the need for inter-node communication. We have highlighted the advantages of the OIRF-LEnKF parallel



architecture as follows.

**Section 2.1.3, Line 267-269:** “...Computational tasks for different chemical species are allocated to independent computational nodes to prevent interference of spurious correlations among chemical species and eliminate the need for inter-node communication...”

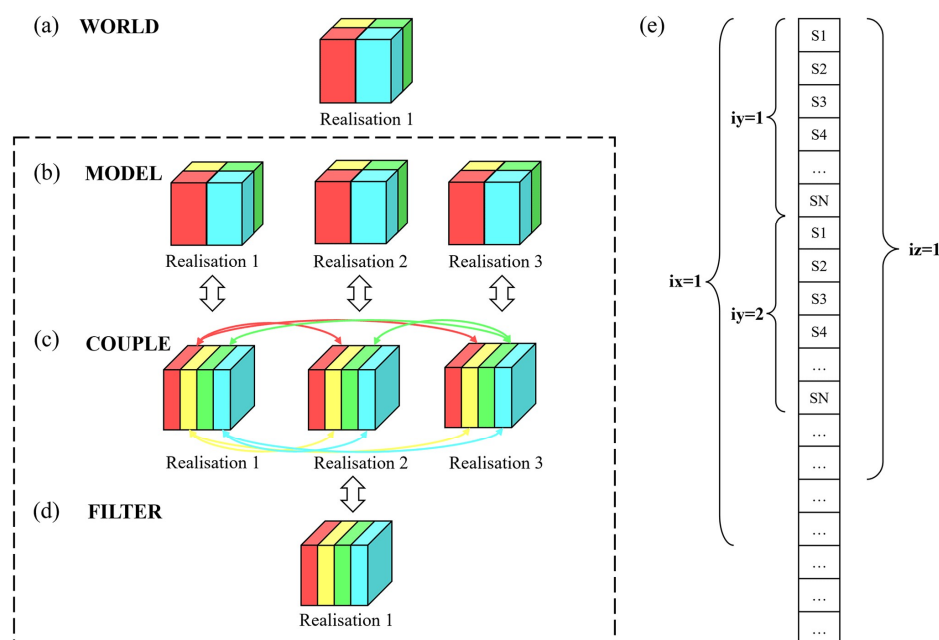

**Fig. R1 in Wang et al. (2022)’s study**

## Reference

Li, H., Yang, T., Nerger, L., Zhang, D., Zhang, D., Tang, G., Wang, H., Sun, Y., Fu, P., Su, H., and Wang, Z.: NAQPMS-PDAF v2.0: a novel hybrid nonlinear data assimilation system for improved simulation of PM<sub>2.5</sub> chemical components, *Geosci. Model Dev.*, 17, 8495-8519, <https://doi.org/10.5194/gmd-17-8495-2024>, 2024.

Wang, H., Yang, T., Wang, Z., Li, J., Chai, W., Tang, G., Kong, L., and Chen, X.: An aerosol vertical data assimilation system (NAQPMS-PDAF v1.0): development and application, *Geosci. Model Dev.*, 15, 3555-3585, <https://doi.org/10.5194/gmd-15-3555-2022>, 2022.

12) The colorbar in all subfigures in Figure 4 should start at 0 so that perceived color variations more closely correspond to significant differences in the values in the table. Figure 4c, for example, has two different colors assigned to 0.77 in the bottom right corner, likely due to small differences past the third decimal place. If these heatmaps no longer look interesting after making this change, then another plotting technique highlighting any interesting aspects should replace Figure 4.

**Authors' response:**

We thank the reviewer for the suggestion. However, as the reviewer anticipated and we verified, setting the colorbar to start at 0 would compress the entire color spectrum into a very narrow range, since our performance metrics (CORR and RMSE) are all concentrated at a narrow scale (e.g., R from 0.70 to 0.84 at analysis step). This would make it impossible to discern the meaningful variations across the parameter space. To address this fundamental issue and fully adhere to the reviewer's suggestion of ensuring visual accuracy, we have chosen to display the percentage change of each metric relative to a defined performance baseline (e.g., minimum CORR and maximum RMSE) and we have utilized a more suitable colorbar.

**Section 3.2, Line 412-425:** “During the ML simulation process, the statistical indicators that compare the background fields and observations for OIRF-LEnKF v1.0 exhibit a pronounced sensitivity to update frequency but are less sensitive to ensemble size. With a fixed ensemble size, the correlation coefficient (CORR) increases as the update frequency rises (Fig. 4a). At the same time, the root mean square error (RMSE) decreases significantly with a higher update frequency (Fig. 4b). Specifically, the percentage change of CORR relative to minimum CORR ( $\Delta\text{CORR}$ ) rises by 2.42 % to 11.75 %, and the percentage change of RMSE relative to maximum RMSE ( $\Delta\text{RMSE}$ ) decreases by 32.55 % to 40.36 % when comparing a 1-hour update frequency to the scenario without incremental learning, which indicates that high-frequency incremental learning effectively enhances the adaptability of the statically trained ML model to the non-stationary data distributions, enabling it to demonstrate improved generalization capabilities and higher simulation accuracy in rapidly changing

chemical component simulations. Notably, an increase in ensemble size can amplify the effect of incremental learning on simulation errors. Specifically, the reduction in  $\Delta RMSE$  at an ensemble size of 100 is approximately 8% greater than at an ensemble size of 20 when comparing a 1-hour update frequency to a scenario without incremental learning (Fig. 4b), which is attributed to the fact that as the ensemble size increases, the probability density distribution becomes more accurate, leading to improved ensemble simulation skill (Chen, 2024).”

Section 3.2, Line 438-440: “...Specifically, the  $\Delta CORR$  increased by 9.75 % to 19.04 %, and the  $\Delta RMSE$  decreased by 16.70 % to 30.48 % when comparing an ensemble size of 200 to that of 20...”

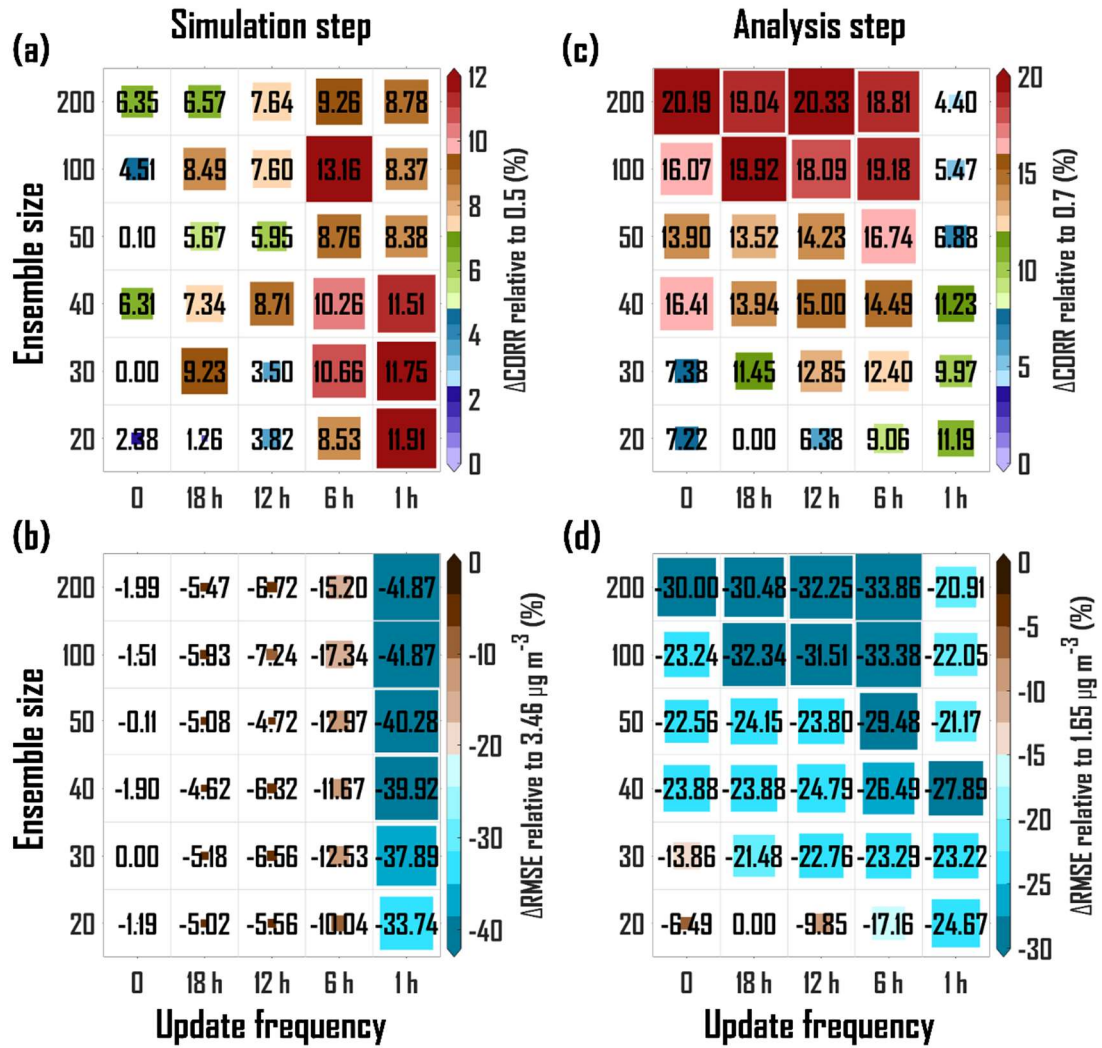

**Figure 4.** (a) Percentage change of Pearson correlation coefficient (CORR) relative to the minimum CORR (0.5) ( $\Delta CORR$ , %) for sensitivity test with six ensemble sizes (20, 30, 40, 50, 100, 200) and five update frequencies (no update, 18-hour interval, 12-hour

interval, 6-hour interval and 1-hour interval) at the simulation step. (b) Same as (a) but for percentage change of root mean square error (RMSE) relative to the maximum RMSE ( $3.46 \mu\text{g m}^{-3}$ ) ( $\Delta\text{RMSE}$ , %) at the simulation step. (c) Same as (a) but for percentage change of CORR relative to the minimum CORR (0.7) at the analysis step. (d) Same as (a) but for percentage change of RMSE relative to the maximum RMSE ( $1.65 \mu\text{g m}^{-3}$ ) at the analysis step.
